# Supplementary material
Source: PubMed Central journal article supplement (PMC6727027)
Supplement: EMBR-20-e48235-s001.pdf [file EMBR-20-e48235-s001.pdf]

# Appendix

## Table of contents:

- p 2: **Appendix figure S1: Nigerin triggers inflammasome-independent necrosis in unprimed U937 cells**
- p 3: **Appendix figure S2: TLR ligands in contrast to IFN- $\gamma$  do not increase caspase-4 levels in *IRF2*<sup>KO</sup> cells.**
- p 4: **Appendix figure S3: *GBP1* transcript level is regulated by IRF1 in the presence of IFN- $\gamma$ .**
- p 5: **Appendix figure S4: Profile of iPSC clones knock-out for *IRF2*.**
- p 6: **Appendix Table 1: Cell lines generated by CRISPR/Cas9 with the validation method.**
- p 7-8: **Appendix table 2: Sequences of all sgRNA used to generate knock-out cell lines.**
- p 9: **Appendix table 3: qRT-PCR primers used in this study**

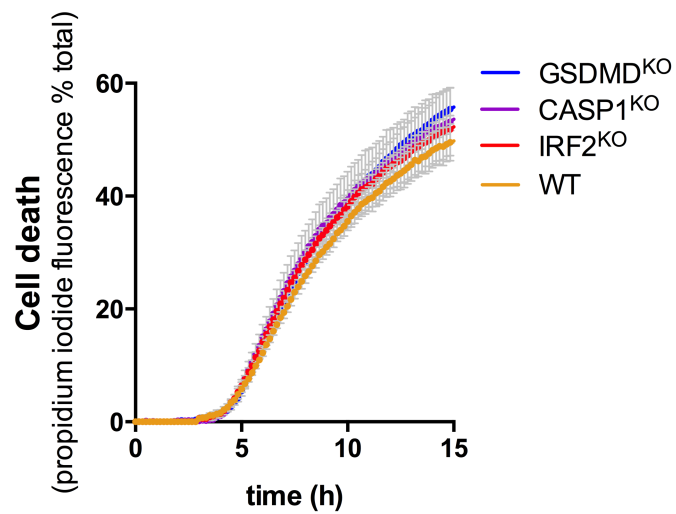

**Appendix figure S1: Nigerin triggers inflammasome-independent necrosis in unprimed U937 cells**

U937 cells of the indicated genotypes (in the absence of PMA and TLR agonist) were treated with nigericin. Cell death was monitored in real time by quantifying propidium iodide (PI) incorporation/fluorescence. Cell death was normalized using untreated and TX-100-treated sample. One experiment representative of two experiments is shown. Each dot represents the mean (+/-SD) of a biological triplicate.

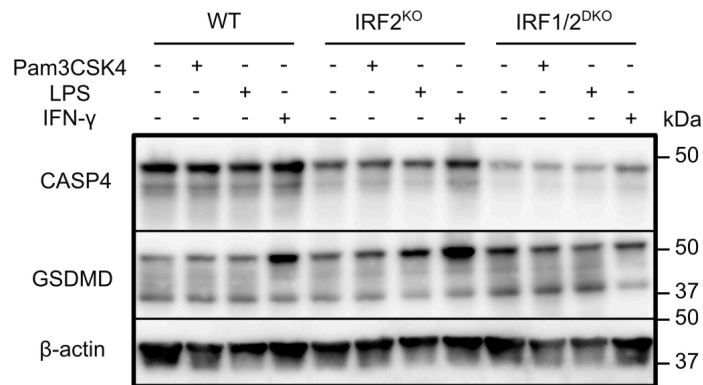

**Appendix figure S2: TLR ligands in contrast to IFN-γ do not increase caspase-4 levels in *IRF2<sup>KO</sup>* cells.**

U937 cells of the indicated genotypes were treated with Pam3CSK4 (1 μg/ml), LPS (100 ng/ml) or IFN-γ (1000 u/ml) for 16 h. Caspase-4, gasdermin D and β-actin levels were determined by western blot analysis.

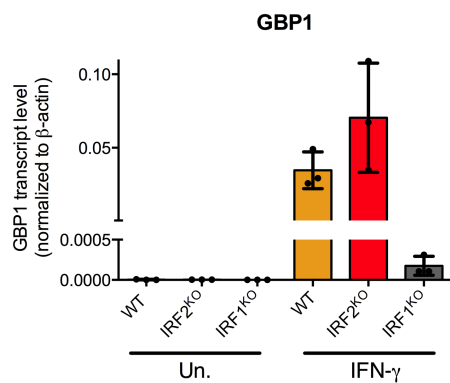

**Appendix figure S3: *GBP1* transcript level is regulated by IRF1 in the presence of IFN- $\gamma$ .**

*GBP1* transcript levels were quantified by qRT-PCR in the indicated cell lines in the presence or absence (Un.) of IFN- $\gamma$  (1000 u/ml, 16 h) and normalized to  $\beta$ -actin levels. One dot represents the average of three technical qRT-PCR values of one experiment, the bar represents the mean (+/- SD) of three independent experiments.

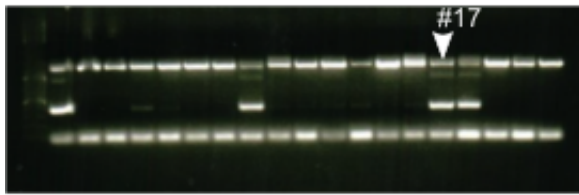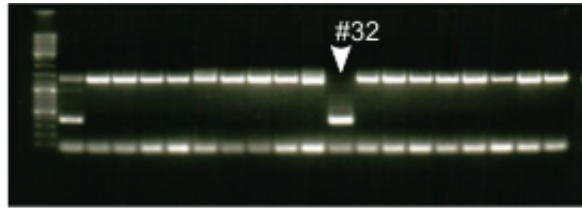

**Appendix figure S4: Profile of iPSC clones invalidated for *IRF2*.**

*IRF2* sequence flanking the two sgRNA was amplified by PCR in different iPSC clones. Clones showing a PCR fragments differing from WT iPSC were selected and sequenced. Clones 17 (presenting a 900 bp on one allele and a 900pb inversion on the second allele) and 32 (homozygous 900pb deletion) were selected for futher investigations

| Cell line                        | Targeted gene       | Validation                                               | Ref                    |
|----------------------------------|---------------------|----------------------------------------------------------|------------------------|
| U937 Cas9 clone                  | <i>None</i>         | WB <sup>1</sup>                                          | (lagrange et al. 2018) |
| U937-CASP1                       | <i>CASP1</i>        | WB <sup>1</sup>                                          | (lagrange et al. 2018) |
| U937-CASP4                       | <i>CASP4</i>        | WB <sup>1</sup>                                          | (lagrange et al. 2018) |
| U937-GSDMD                       | <i>GSDMD</i>        | WB <sup>1</sup>                                          | (lagrange et al. 2018) |
| U937-IRF1 <sup>KO</sup>          | <i>IRF1</i>         | WB <sup>1</sup>                                          | This work              |
| U937-IRF2 <sup>KO</sup>          | <i>IRF2</i>         | WB <sup>1</sup>                                          | This work              |
| U937-IRF3 <sup>KO</sup>          | <i>IRF3</i>         | 88% <sup>2</sup>                                         | This work              |
| U937-IRF4 <sup>KO</sup>          | <i>IRF4</i>         | 93% <sup>2</sup>                                         | This work              |
| U937-IRF5 <sup>KO</sup>          | <i>IRF5</i>         | AG <sup>3</sup>                                          | This work              |
| U937-IRF6 <sup>KO</sup>          | <i>IRF6</i>         | 91% <sup>2</sup>                                         | This work              |
| U937-IRF7 <sup>KO</sup>          | <i>IRF7</i>         | >50% <sup>4</sup>                                        | This work              |
| U937-IRF8 <sup>KO</sup>          | <i>IRF8</i>         | 85% <sup>2</sup>                                         | This work              |
| U937-IRF9 <sup>KO</sup>          | <i>IRF9</i>         | 95% <sup>2</sup>                                         | This work              |
| U937-IRF1/2 <sup>DKO</sup>       | <i>IRF1</i>         | WB <sup>1</sup>                                          | This work              |
|                                  | <i>IRF2</i>         | WB <sup>1</sup>                                          |                        |
| U937-IRF2/3 <sup>DKO</sup>       | <i>IRF2</i>         | WB <sup>1</sup>                                          | This work              |
|                                  | <i>IRF3</i>         | 89% <sup>2</sup>                                         |                        |
| U937-IRF2/4 <sup>DKO</sup>       | <i>IRF2</i>         | WB <sup>1</sup>                                          | This work              |
|                                  | <i>IRF4</i>         | 98% <sup>2</sup>                                         |                        |
| U937-IRF2/5 <sup>DKO</sup>       | <i>IRF2</i>         | WB <sup>1</sup>                                          | This work              |
|                                  | <i>IRF5</i>         | AG <sup>3</sup>                                          |                        |
| U937-IRF2/6 <sup>DKO</sup>       | <i>IRF2</i>         | WB <sup>1</sup>                                          | This work              |
|                                  | <i>IRF6</i>         | 93% <sup>2</sup>                                         |                        |
| U937-IRF2/7 <sup>DKO</sup>       | <i>IRF2</i>         | WB <sup>1</sup>                                          | This work              |
|                                  | <i>IRF7</i>         | >50% <sup>4</sup>                                        |                        |
| U937-IRF2/8 <sup>DKO</sup>       | <i>IRF2</i>         | WB <sup>1</sup>                                          | This work              |
|                                  | <i>IRF8</i>         | 89% <sup>2</sup>                                         |                        |
| U937-IRF2/9 <sup>DKO</sup>       | <i>IRF2</i>         | WB <sup>1</sup>                                          | This work              |
|                                  | <i>IRF9</i>         | 93% <sup>2</sup>                                         |                        |
| U937-INTS6 <sup>KO</sup>         | <i>INTS6</i>        | 84% <sup>2</sup>                                         | This work              |
| U937-PDHA1 <sup>KO</sup>         | <i>PDHA1</i>        | 88% <sup>2</sup>                                         | This work              |
| U937- <b>DET1</b> <sup>KO</sup>  | <b><i>DET1</i></b>  | <b>43%<sup>2</sup></b>                                   | <b>This work</b>       |
| U937-WDR73 <sup>KO</sup>         | <i>WDR73</i>        | 80% <sup>2</sup>                                         | This work              |
| U937-IKBKE <sup>KO</sup>         | <i>IKBKE</i>        | 94% <sup>2</sup>                                         | This work              |
| U937-COPI <sup>KO</sup>          | <i>COPI</i>         | 93% <sup>2</sup>                                         | This work              |
| U937- <b>TFAP4</b> <sup>KO</sup> | <b><i>TFAP4</i></b> | <b>98%<sup>3</sup></b>                                   | <b>This work</b>       |
| U937-ARPC1A <sup>KO</sup>        | <i>ARPC1A</i>       | 80% <sup>2</sup>                                         | This work              |
| U937-FIG4 <sup>KO</sup>          | <i>FIG4</i>         | 83% <sup>2</sup>                                         | This work              |
| U937-IFI27L1 <sup>KO</sup>       | <i>IFI27L1</i>      | 77% <sup>2</sup>                                         | This work              |
| U937-MTF1 <sup>KO</sup>          | <i>MTF1</i>         | 88% <sup>2</sup>                                         | This work              |
| U937-RUNX1 <sup>KO</sup>         | <i>RUNX1</i>        | 85% <sup>2</sup>                                         | This work              |
| iPSC-WT                          | <i>NA</i>           |                                                          | NIMH                   |
| iPSC-CASP1 <sup>KO</sup> #C14    | <i>CASP1</i>        | WB <sup>1</sup> , AG <sup>3</sup> ,<br>100% <sup>2</sup> | This work              |
| iPSC- IRF2 <sup>KO</sup> #C17    | <i>IRF2</i>         | WB <sup>1</sup> , AG <sup>3</sup> ,<br>100% <sup>2</sup> | This work              |
| iPSC- IRF2 <sup>KO</sup> #C32    | <i>IRF2</i>         | WB <sup>1</sup> , AG <sup>3</sup> ,<br>100% <sup>2</sup> | This work              |

1: WB: Validation by Western blotting analysis  
2: Overall efficiency determined for 1 sgRNA by sequencing of the flanking region and analysis by tide.  
3: AG: gene deletion visible by DNA electrophoresis on agarose gel  
4: Overall efficiency determined for 1 sgRNA by sequencing of the flanking region and visual analysis (due to high GC content and poor sequencing quality, TIDE automatic analysis could not be used)  
5: Including 72% of non-disrupting deletions (-3 or -9 nucleotides)  
NA: Not applicable

**Appendix Table 1: Cell lines generated by CRISPR/Cas9 with the validation method.** The two cell lines in red were not validated due to low CRISPR efficiency <50% or due to a high frequency of non ORF-disrupting indels.

| Gene target                | sgRNA # | Sequence (5'-3')      |
|----------------------------|---------|-----------------------|
| <i>GSDMD</i>               | 1       | TGAGTGTGGACCCTAACACC  |
|                            | 2       | AGGTTGACACACTTATAACG  |
| <i>CASP1</i> <sup>1</sup>  | 1       | ACAGACAAGGGTGCTGAACA  |
|                            | 2       | ATGGAAACAAAAGTCGGCAG  |
| <i>CASP1</i> <sup>2</sup>  | 1       | TATTGAGAGCAAGACGTGTG  |
|                            | 2       | GACAGTATTCTAGAGAAGAAC |
| <i>CASP4</i>               | 1       | AGTTATCCAAAACACCAGTG  |
|                            | 2       | TGCAGCTCATCCGAATATGG  |
| <i>IRF1</i>                | 1       | GAACTCCCTGCCAGATATCG  |
|                            | 2       | TCTAGGCCGATACAAAGCAG  |
| <i>IRF2</i> <sup>1,2</sup> | 1       | CAGCATTTCGGTAGACCCTGA |
|                            | 2       | GGATGCATGCGGCTAGACAT  |
| <i>IRF3</i>                | 1       | AGAAGGGTTGCGTTTAGCAG  |
|                            | 2       | GAGGTGACAGCCTTCTACCG  |
| <i>IRF4</i>                | 1       | CAGACCCGTACAAAGTGTAC  |
|                            | 2       | CCCATGACGTTTGGACCCCG  |
| <i>IRF5</i>                | 1       | AGAAGCGCTGCTGTCACTG   |
|                            | 2       | AGATCAAGTTTCAGTACCGG  |
| <i>IRF6</i>                | 1       | AAGGGCTGTATAGGTGCCTG  |
|                            | 2       | CAAGTTTCAGTACCGTGGGA  |
| <i>IRF7</i>                | 1       | CACCTTGAAGATGCGCGCGT  |
|                            | 2       | GATGCACTCACCTTGCACCG  |
| <i>IRF8</i>                | 1       | ATGGCTCGGAAATGTCCAGT  |
|                            | 2       | CTTCTGTGGACGATTACATG  |
| <i>IRF9</i>                | 1       | AACTGAGGCCCCCTTCAAG   |
|                            | 2       | AATTTAAGGAGGTTCTGAG   |
| <i>INTS6</i>               | 1       | AAAGTCCGAGCCGATCACA   |
|                            | 2       | ACTACAGGATGAGATGTACG  |
| <i>PDHA1</i>               | 1       | AGCACTGATTACTACAAGAG  |
|                            | 2       | GATGCAGACTGTACGCCGAA  |
| <i>DET1</i>                | 1       | AATCAGTGACCCCAACCCA   |
|                            | 2       | ACGCACGTTCAAGTGTGACA  |
| <i>RUNX1</i>               | 1       | TAGATGATCAGACCAAGCCC  |
|                            | 2       | CTGATCGTAGGACCACGGTG  |
| <i>MTF1</i>                | 1       | GCACATTCGAACTCATAACAG |
|                            | 2       | AATGCACTTCCACAACACAA  |
| <i>PACSI</i>               | 1       | AGATCTGGGCCACAGCACGC  |
|                            | 2       | GATGAACCTGTACGCCACCT  |

|                |   |                       |
|----------------|---|-----------------------|
| <i>ZNF699</i>  | 1 | TTTGTGTTCTGTGAGCGATG  |
|                | 2 | CAAAACTCACTGTACATGGG  |
| <i>WDR73</i>   | 1 | AAAGACGCCCATCTGAGCCA  |
|                | 2 | GATTTCAAAGTGCGCCATGG  |
| <i>IKBKE</i>   | 1 | AGCATCCCGACATGTATGAG  |
|                | 2 | CGTGCACAAGCAGACCAGTG  |
| <i>TRIM28</i>  | 1 | CCAGCGGGTGAAGTACACCA  |
|                | 2 | CTTCCCAGGCAGTACCACTG  |
| <i>COPI</i>    | 1 | GATTCTTATGGAATTCCTCA  |
|                | 2 | TACCAATCTAGACAACCTCAG |
| <i>TFAP4</i>   | 1 | ACAGCTCAAGCGCTTCATCC  |
|                | 2 | AGGCTCCCCGGACATCTGGG  |
| <i>ARPC1A</i>  | 1 | CATGTGACTTCAAATGCAGG  |
|                | 2 | GAGCACAACGGACACATCAC  |
| <i>FIG4</i>    | 1 | CACAGGTGGAATGAACTAGG  |
|                | 2 | GAAGGATTAATTACACAAGG  |
| <i>IFI27L1</i> | 1 | GAGAGTGGATGGGACTCAGG  |
|                | 2 | GGCTGTGGGGACTGTGCTCG  |

**Appendix table 2: Sequences of all sgRNA used to generate knock-out cell lines.**

<sup>1</sup>sgRNA used to generate U937 mutated cell lines

<sup>2</sup>sgRNA used to generate iPSC deleted clones



| <b>gene</b>    | <b>Sequence (5'-3')</b> | <b>Ref</b>              |
|----------------|-------------------------|-------------------------|
| <i>CASP1</i>   | CTGGGGACTCTCAGCAGATCA   | (Lagrange et al., 2018) |
|                | ATAGCTGGGTTGTCCTGCAC    |                         |
| <i>CASP4</i>   | GGCAGGACAAATGCTTCTTC    | (Lagrange et al., 2018) |
|                | GACAAAGCTTGAGGGCATCT    |                         |
| <i>NLRP3</i>   | CACCTGTTGTGCAATCTGAAG   | (Lagrange et al., 2018) |
|                | GCAAGATCCTGACAACATGC    |                         |
| <i>GBP1</i>    | CCAGTGCTCGTGAACCTAAGGA  | (Lagrange et al., 2018) |
|                | TGTCAGTGGATCTCTGATGC    |                         |
| <i>ASC</i>     | GGGACCAAGGGTGTAGTAAGG   | this work               |
|                | ACTCTGGTCTCCCGACTCC     |                         |
| <i>β-actin</i> | ATTGGCAATGAGCGGTTC      | (Lagrange et al., 2018) |
|                | CGTGGATGCCACAGGACT      |                         |

**Appendix table 3: qRT-PCR primers used in this study**
